# Supplementary material for: Impacts of Extreme Climate Events on Future Rice Yields in Global Major Rice-Producing Regions
Source: MDPI journal article supplement (doi:10.3390/ijerph19084437), 2022-04-07
Supplement: s1 [file s1]

# The Supplementary Materials of “Impacts of Extreme Climate Events on Future Rice Yields in Global Major Rice-producing Regions”

This file includes:

Supplementary Table S1, Figures S1–S5

## Introduction

This supporting information mainly provides the list of CMIP6 models used in this study, the spatial distribution of extreme climate events (Tx90p, Tn10p, R99p, Rx5day) in the world's four major rice-producing regions under the SSP126 and SSP585 pathways and the relationship between historical rice yield and various factors.

**Table S1.** Basic information and atmospheric resolution of twelve CMIP6 global climate models.

| Model name    | Group            | Resolution                           |
|---------------|------------------|--------------------------------------|
| ACCESS-ESM1-5 | ACCESS/Australia | $1.25^{\circ} \times 1.875^{\circ}$  |
| AWI-CM-1-1-MR | AWI/Germany      | $0.93^{\circ} \times 0.9375^{\circ}$ |
| BCC-CSM2-MR   | BCC/China        | $1.112^{\circ} \times 1.125^{\circ}$ |
| EC-Earth3     | CCCma/Canada     | $0.7^{\circ} \times 0.7^{\circ}$     |
| GFDL-ESM4     | GFDL/USA         | $1^{\circ} \times 1.25^{\circ}$      |
| INM-CM4-8     | INM/Russia       | $1.5^{\circ} \times 2^{\circ}$       |
| IPSL-CM6A-LR  | IPSL/France      | $1.27^{\circ} \times 2.5^{\circ}$    |
| MIROC6        | AORI/Japan       | $1.389^{\circ} \times 1.406^{\circ}$ |
| MPI-ESM1-2-HR | MPI/Germany      | $0.93^{\circ} \times 0.9375^{\circ}$ |

|            |             |                                     |
|------------|-------------|-------------------------------------|
| MRI-ESM2-0 | MRI/Japan   | $1.1^{\circ} \times 1.1^{\circ}$    |
| NESM3      | NESM3/China | $1.85^{\circ} \times 1.875^{\circ}$ |
| NorESM2-MM | NCC/Norway  | $0.94^{\circ} \times 1.25^{\circ}$  |

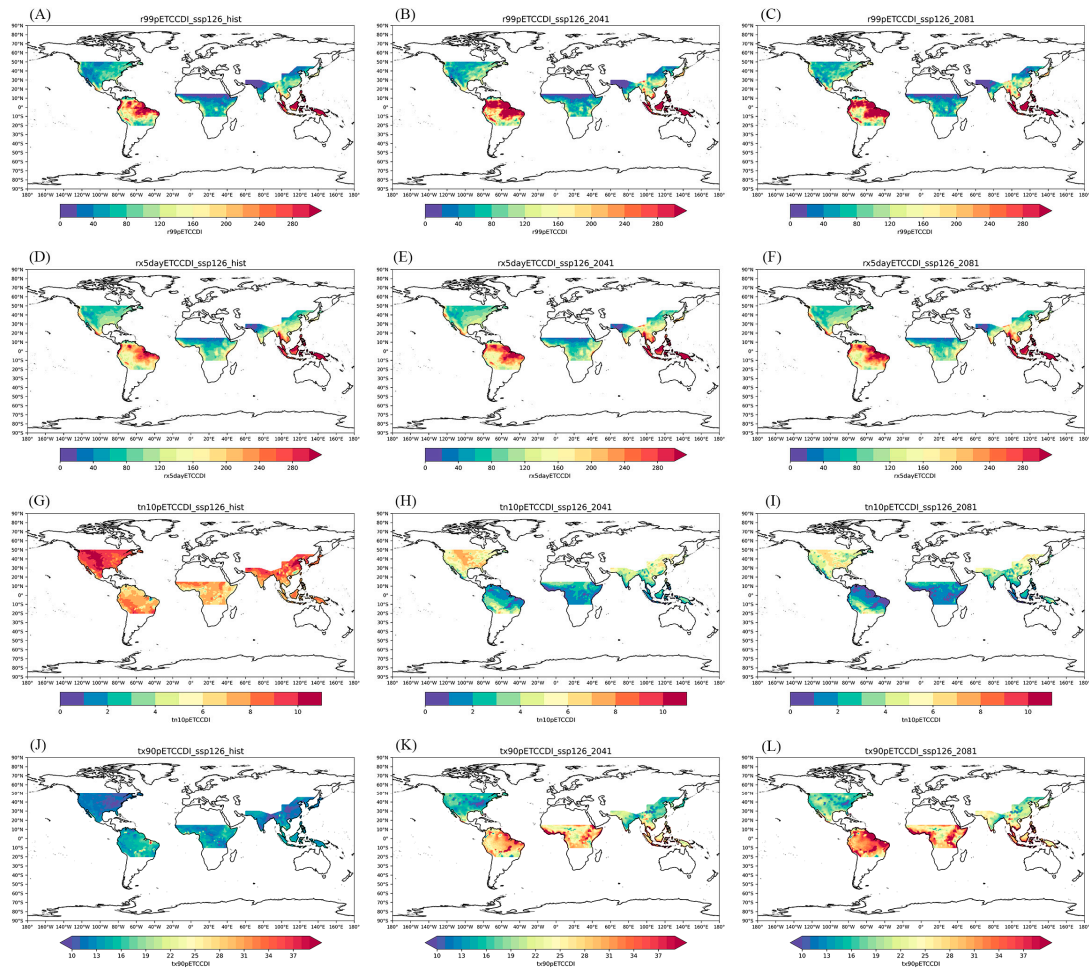

**Figure S1.** Spatial distribution of extreme climate events (Tx90p, Tn10p, R99p, Rx5day) in the world's four major rice-producing regions under the SSP126 pathway

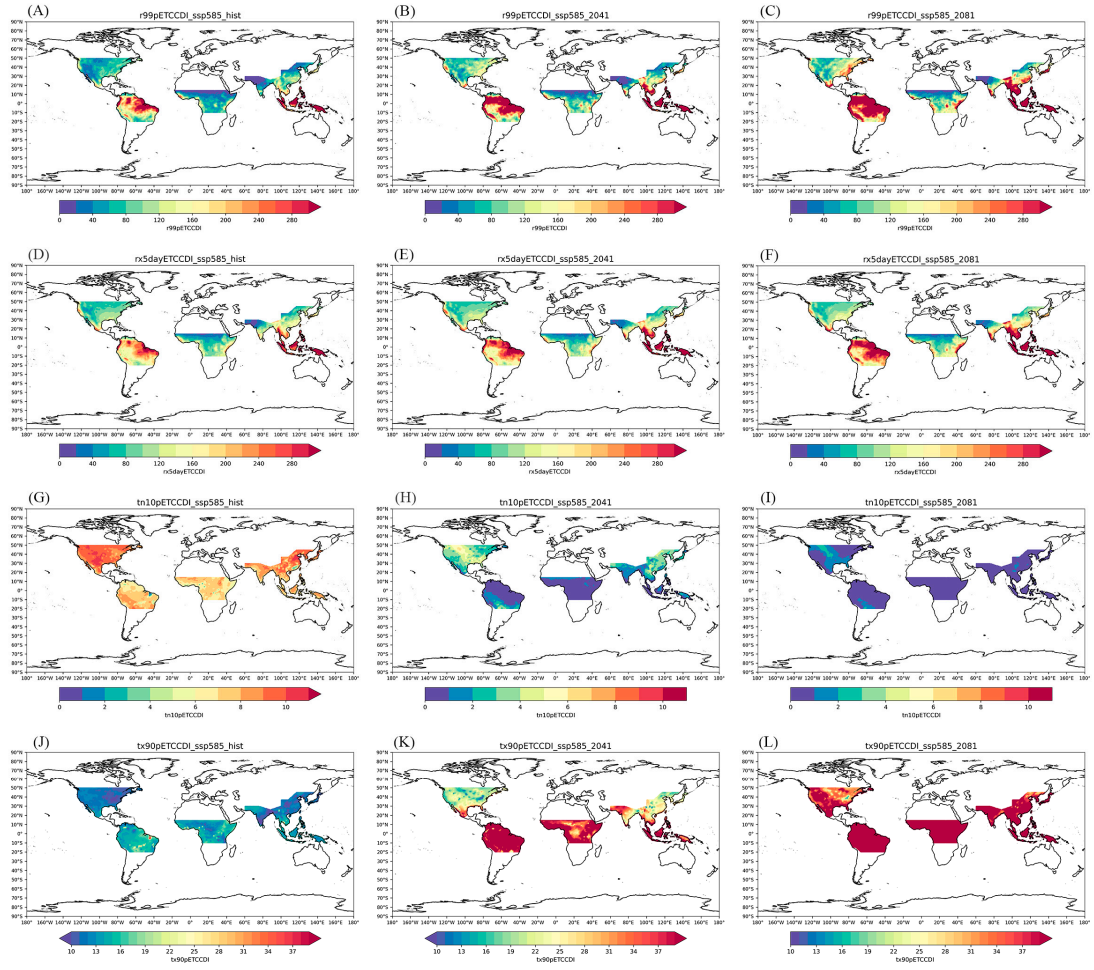

**Figure S2.** Spatial distribution of extreme climate events (Tx90p, Tn10p, R99p, Rx5day) in the world's four major rice-producing regions under the SSP585 pathway

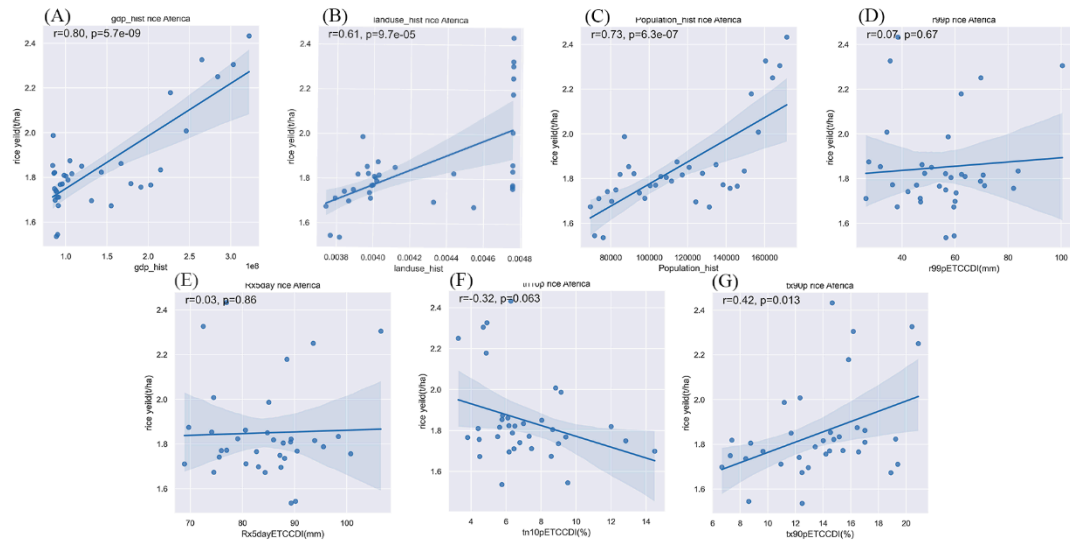

**Figure S3.** The relationship between extreme climate indices, economic factors and rice yield in African rice-producing region

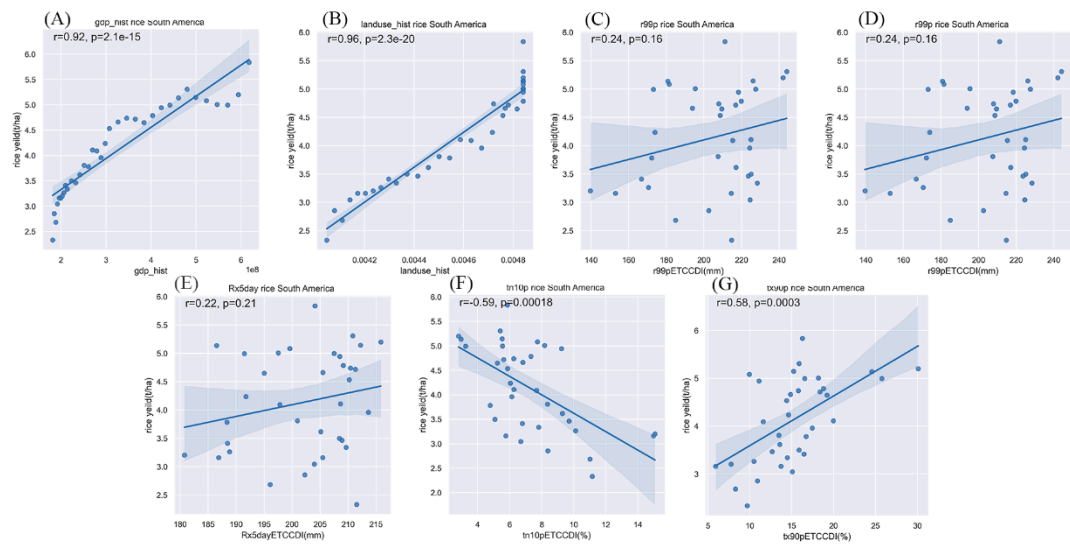

**Figure S4.** The relationship between extreme climate indices, economic factors and rice yield in South American rice-producing region

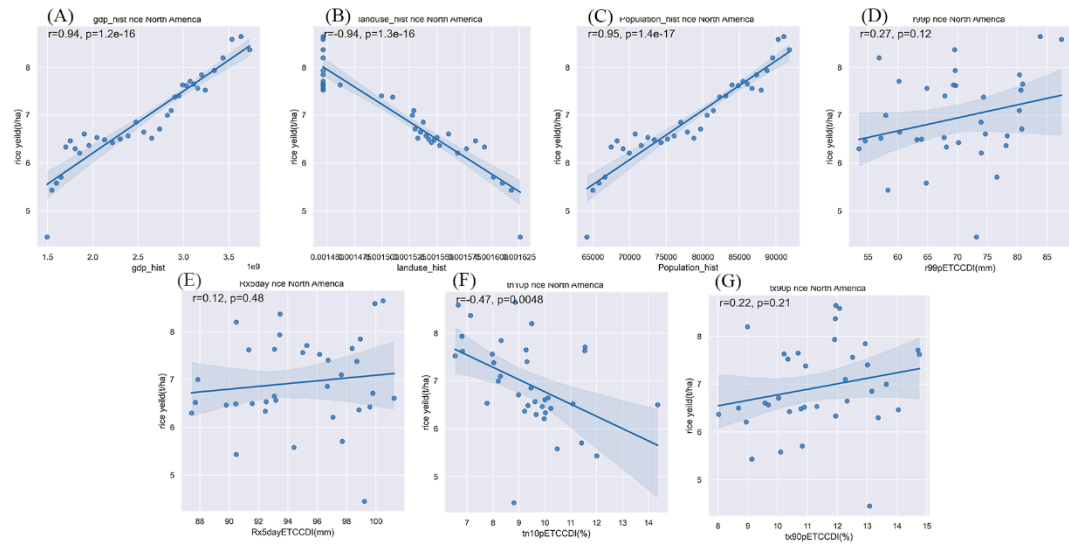

**Figure S5.** The relationship between extreme climate indices, economic factors and rice yield in North American rice-producing region
